# Supplementary material for: Xylose Improves Antibiotic Activity of Chloramphenicol and Tetracycline againstK. pneumoniaeandA. baumanniiin a Murine Model of Skin Infection
Source: Hindawi journal article supplement (doi:10.1155/2018/3467219), 2018-07-18
Supplement: f1 [file 3467219.f1.pdf]

**Supplementary Data for:**

**Xylose improves antibiotic activity of chloramphenicol and tetracycline against *K. pneumoniae* and *A. baumannii* in a murine model of skin infection**

Alejandro A. Hidalgo, Ángel J. Arias, Juan A. Fuentes, Patricia García, Guido C. Mora,  
Nicolás A. Villagra

**Table S1:** *A. baumannii* and *K. pneumoniae* strains used in this study and their susceptibility to tetracycline and chloramphenicol in the presence of glucose or xylose, as the sole carbon source, and the presence of the efflux pump inhibitor CCCP.

| Strains                    | Resistance mechanism | Antibiotics | Inhibition Halo (mm) |     |          |
|----------------------------|----------------------|-------------|----------------------|-----|----------|
|                            |                      |             | Glu                  | Xyl | Glu+CCCP |
| <i>A. baumannii</i> 34702  | EDR                  | Tet         | 45                   | 50  | 52       |
| <i>A. baumannii</i> 34724  | EDR                  | Tet         | 38                   | 43  | 43       |
| <i>A. baumannii</i> 34938  | EDR                  | Tet         | 38                   | 44  | 43       |
| <i>A. baumannii</i> 18628  | EDR                  | Tet         | 37                   | 43  | 44       |
| <i>A. baumannii</i> 19328  | EDR                  | Tet         | 38                   | 42  | 43       |
| <i>A. baumannii</i> 18624  | EDR                  | Tet         | 36                   | 42  | 42       |
| <i>A. baumannii</i> 18395  | EDR                  | Tet         | 38                   | 43  | 43       |
| <i>A. baumannii</i> 18698  | EDR                  | Tet         | 37                   | 44  | 44       |
| <i>A. baumannii</i> 18684  | EDR                  | Tet         | 37                   | 42  | 43       |
| <i>A. baumannii</i> 34280  | EIR                  | Tet         | 45                   | 45  | 44       |
| <i>A. baumannii</i> 34562  | EIR                  | Tet         | 38                   | 38  | 38       |
| <i>A. baumannii</i> 18394  | EIR                  | Tet         | 37                   | 37  | 37       |
| <i>A. baumannii</i> 19381  | EIR                  | Tet         | 36                   | 37  | 36       |
| <i>A. baumannii</i> 19075  | EIR                  | Tet         | 38                   | 38  | 38       |
| <i>A. baumannii</i> 18775  | EIR                  | Tet         | 37                   | 38  | 37       |
| <i>K. pneumoniae</i> 28296 | EDR                  | Cam         | 39                   | 49  | 48       |
| <i>K. pneumoniae</i> 27935 | EDR                  | Cam         | 30                   | 37  | 36       |
| <i>K. pneumoniae</i> 28295 | EDR                  | Cam         | 38                   | 47  | 47       |
| <i>K. pneumoniae</i> 27698 | EDR                  | Cam         | 38                   | 47  | 46       |
| <i>K. pneumoniae</i> 28115 | EDR                  | Cam         | 29                   | 38  | 38       |
| <i>K. pneumoniae</i> 28532 | EDR                  | Cam         | 31                   | 38  | 37       |
| <i>K. pneumoniae</i> 28106 | EDR                  | Cam         | 29                   | 36  | 37       |
| <i>K. pneumoniae</i> 28558 | EDR                  | Cam         | 28                   | 37  | 36       |
| <i>K. pneumoniae</i> 28552 | EDR                  | Cam         | 26                   | 35  | 37       |
| <i>K. pneumoniae</i> 28155 | EDR                  | Cam         | 28                   | 38  | 38       |
| <i>K. pneumoniae</i> 28341 | EIR                  | Cam         | 13                   | 15  | 15       |
| <i>K. pneumoniae</i> 1705  | EIR                  | Cam         | 15                   | 15  | 15       |
| <i>K. pneumoniae</i> 27665 | EIR                  | Cam         | 13                   | 13  | 14       |

EDR: Efflux-Dependent Resistance; EIR: Efflux-Independent Resistance; Tet, tetracycline; Cam, chloramphenicol.

**Table S2.** Inhibition haloes (measured in mm after 12 h of incubation)

| Bacteria                   | Antibiotics     | Inhibition Halo (mm) |        |
|----------------------------|-----------------|----------------------|--------|
|                            |                 | Glucose              | Xylose |
| <i>A. baumannii</i> 34702  | Tetracycline    | 45                   | 50     |
| <i>K. pneumoniae</i> 28296 | Chloramphenicol | 39                   | 48     |

**Table S3.** Inhibition haloes (measured in mm after 72 h of incubation)

| Bacteria                   | Antibiotics     | Inhibition Halo (mm) |        |
|----------------------------|-----------------|----------------------|--------|
|                            |                 | Glucose              | Xylose |
| <i>A. baumannii</i> 34702  | Tetracycline    | 45                   | 50     |
| <i>K. pneumoniae</i> 28296 | Chloramphenicol | 39                   | 48     |

**Table S4:** Susceptibility profile of *A. baumannii* and *K. pneumoniae* strains with different concentration of xylose.

| Bacteria                   | Antibiotics     | Inhibition Halo (mm) |             |           |
|----------------------------|-----------------|----------------------|-------------|-----------|
|                            |                 | Glucose              | Xylose 0,2% | Xylose 2% |
| <i>A. baumannii</i> 34702  | Tetracycline    | 45                   | 50          | 51        |
| <i>K. pneumoniae</i> 28296 | Chloramphenicol | 39                   | 49          | 49        |

**Table S5:** Susceptibility profile of *A. baumannii* and *K. pneumoniae* strains in the presence of glucose, xylose and a mixture of glucose and xylose.

| Bacteria                   | Antibiotics     | Inhibition Halo (mm) |        |                  |
|----------------------------|-----------------|----------------------|--------|------------------|
|                            |                 | Glucose              | Xylose | Glucose + Xylose |
| <i>A. baumannii</i> 34702  | Tetracycline    | 45                   | 50     | 44               |
| <i>K. pneumoniae</i> 28296 | Chloramphenicol | 39                   | 49     | 39               |

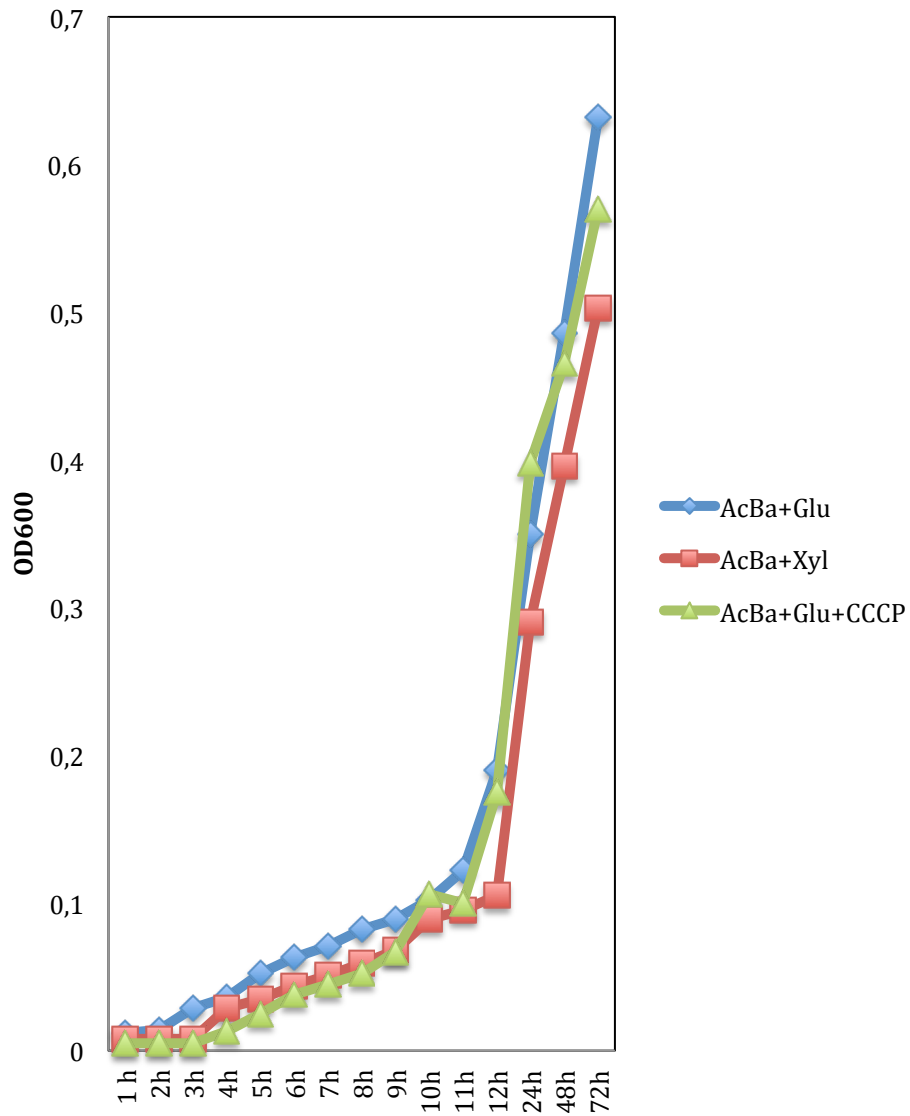

**Figure S1:** Growth curves for *A. baumannii* 34702 (AcBa) in the presence of glucose or xylose, as the sole carbon sources, and glucose plus CCCP.

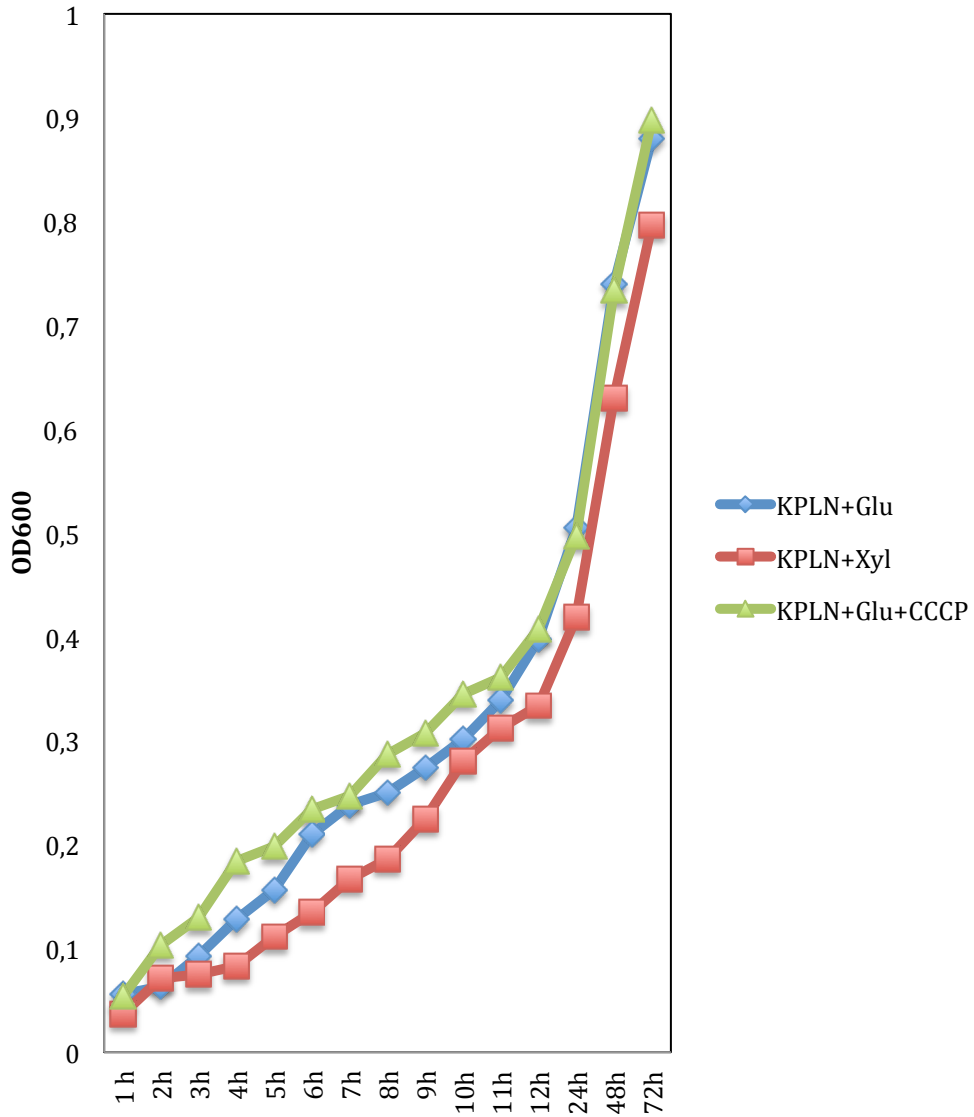

**Figure S2:** Growth curves for *K. pneumoniae* 28296 (KPLN) in the presence of glucose or xylose, as the sole carbon source, and glucose plus CCCP.

## **Highlights**

1. Xylose decreases efflux-mediated resistance in multiresistant bacteria *in vitro*
2. Xylose improves antibiotics activity against multiresistant bacteria *in vivo*
3. Xylose + antibiotic formulations work efficiently to treat skin infections

**Conflict of interest**

None to declare
